# Supplementary material for: GPX2 and BMP4 as Significant Molecular Alterations in The Lung Adenocarcinoma Progression: Integrated Bioinformatics Analysis
Source: PubMed Central journal article supplement — Cell J. 2022 Jun 29;24(6):302–8. doi: 10.22074/cellj.2022.7930 (PMC9315209; doi:10.22074/cellj.2022.7930), 2022-06-29
Supplement: Cell-J-24-302-s01.pdf [file Cell-J-24-302-s01.pdf]

## Supplementary Information for

# ***GPX2* and *BMP4* as Significant Molecular Alterations in The Lung Adenocarcinoma Progression: Integrated Bioinformatics Analysis**

Mohammad Hossein Derakhshan Nazari, B.Sc.<sup>1#</sup>, Rana Askari Dastjerdi, B.Sc.<sup>1#</sup>, Parnian Ghaedi Talkhouncheh, B.Sc.<sup>2#</sup>, Ahmad Bereimipour, M.Sc.<sup>3</sup>, Hamidreza Mollasalehi, Ph.D.<sup>2</sup>, Amir Ali Mahshad, B.Sc.<sup>1</sup>, Ali Razi, B.Sc.<sup>4</sup>, Mohammad Hossein Nazari, M.Sc.<sup>5</sup>, Amin Ebrahimi Sadrabadi, Ph.D.<sup>3\*</sup>, Sara Taleahmad, Ph.D.<sup>3\*</sup>

1. Department of Microbiology and Microbial Biotechnology, Faculty of Life Science and Biotechnology, Shahid Beheshti University, Tehran, Iran
2. Department of Cell and Molecular Biology, Faculty of Life Science and Biotechnology, Shahid Beheshti University, Tehran, Iran
3. Department of Stem Cells and Developmental Biology, Cell Science Research Center, Royan Institute for Stem Cell Biology and Technology, ACECR, Tehran, Iran
4. Biophysics Department, Science Faculty, York University, Toronto, Canada
5. V. Zelman Institute for Medicine and Psychology, Novosibirsk State University, Novosibirsk, Russia

\*Corresponding Address: P.O. Box: 16635-148, Department of Stem Cells and Developmental Biology, Cell Science Research Center, Royan Institute for Stem Cell Biology and Technology, ACECR, Tehran, Iran

Emails: amin.ebrahimi@royaninsitute.org, s.taleahmad@royan-rc.ac.ir

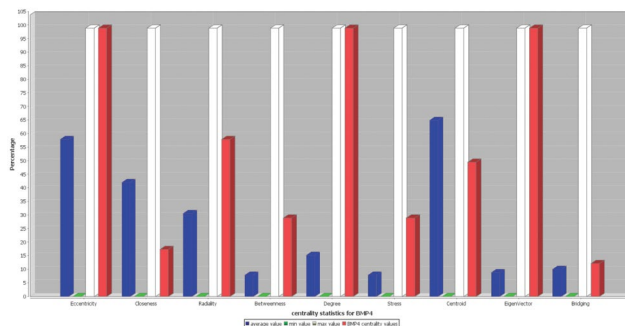

Fig.S1: BMP4 as the critical protein in a network manifested by CentiScape plugin.

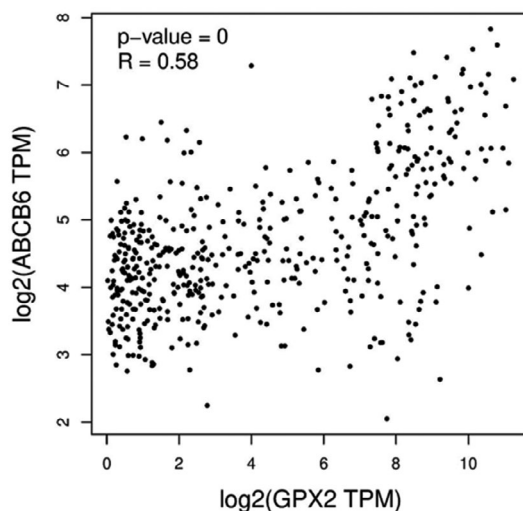

Fig.S2: The positive expression between *GPX2* and *ABCB6* has indicated by Pearson correlation calculation.

Table S1: Selected samples

| Stages | Data series |            |           |            |           |            | Total samples |
|--------|-------------|------------|-----------|------------|-----------|------------|---------------|
|        | GSE41271    |            | GSE42127  |            | GSE75037  |            |               |
| IA     | 4 samples   | GSM1012836 | 4 samples | GSM1032885 | 4 samples | GSM1941127 | 12            |
|        |             | GSM1012840 |           | GSM1032889 |           | GSM1941129 |               |
|        |             | GSM1012843 |           | GSM1032892 |           | GSM1941149 |               |
|        |             | GSM1012848 |           | GSM1032895 |           | GSM1941153 |               |
| IB     | 4 samples   | GSM1012832 | 4 samples | GSM1032881 | 4 samples | GSM1941123 | 12            |
|        |             | GSM1012833 |           | GSM1032882 |           | GSM1941125 |               |
|        |             | GSM1012837 |           | GSM1032886 |           | GSM1941133 |               |
|        |             | GSM1012838 |           | GSM1032887 |           | GSM1941141 |               |
| IIA    | 4 samples   | GSM1012918 | 4 samples | GSM1032910 | 3 samples | GSM1941227 | 11            |
|        |             | GSM1012900 |           | GSM1032932 |           | GSM1941247 |               |
|        |             | GSM1012868 |           | GSM1032945 |           | GSM1941265 |               |
|        |             | GSM1013011 |           | GSM1032982 |           | -          |               |
| IIB    | 4 samples   | GSM1012847 | 4 samples | GSM1032898 | 4 samples | GSM1941121 | 12            |
|        |             | GSM1012852 |           | GSM1032902 |           | GSM1941137 |               |
|        |             | GSM1012856 |           | GSM1032913 |           | GSM1941139 |               |
|        |             | GSM1012869 |           | GSM1032914 |           | GSM1941155 |               |
| IIIA   | 4 samples   | GSM1012828 | 4 samples | GSM1032893 | 4 samples | GSM1941131 | 12            |
|        |             | GSM1012844 |           | GSM1032901 |           | GSM1941195 |               |
|        |             | GSM1012845 |           | GSM1032907 |           | GSM1941199 |               |
|        |             | GSM1012851 |           | GSM1033052 |           | GSM1941231 |               |
| IIIB   | 4 samples   | GSM1012830 | 4 samples | GSM1032884 | 1 sample  | GSM1941239 | 9             |
|        |             | GSM1012835 |           | GSM1032957 |           | -          |               |
|        |             | GSM1012891 |           | GSM1033020 |           | -          |               |
|        |             | GSM1012917 |           | GSM1033040 |           | -          |               |
| IV     | 4 samples   | GSM1013100 | 1 sample  | GSM1033019 | 2 samples | GSM1941135 | 7             |
|        |             | GSM1013060 |           | -          |           | GSM1941145 |               |
|        |             | GSM1013003 |           | -          |           | -          |               |
|        |             | GSM1013014 |           | -          |           | -          |               |

GSM is the accession code for each chip in the GEO database.

Table S2: Commonly differentially expressed genes (DEG) achieved by the Venn diagram

| Groups  | Commonly DEGs                                                                                                                                                                                                                                                 |                                                                                                                                                                                             |
|---------|---------------------------------------------------------------------------------------------------------------------------------------------------------------------------------------------------------------------------------------------------------------|---------------------------------------------------------------------------------------------------------------------------------------------------------------------------------------------|
|         | Downregulated                                                                                                                                                                                                                                                 | Upregulated                                                                                                                                                                                 |
| Group 1 | <i>ITLN2/STXBP6/CA4/SPTBN1/BMP4/AGER/CDO1/TMPRSS3/TMEM100/LIPH/TCEAL2/MT3/PROX1/BEX3/CLUL1/CDKN2B/ARMCX2/KTN1/RHOJ/ARHGAP28/NTNG1/NT5DC1/GPR137C/LYVE1/CCNG1/CA2/ARHGAP24/CCDC50/PTPRD/AIDA/RCOR2/ZAK/SHPRH/CSRNP3/LRCH2/ADGRL2/DACH1/SNX14/B3GALNT1/MPDZ</i> | <i>MT1X/MT2A/SNORD46/SNORD55/PTPRE/TOM1/SNORD56/COL9A2/SLC34A2/VDR/KRT7/CPM/NOC4L/NAGA/IRF7/DPP9/VWA1/B3GAT3/GPR132/PYCARD/ZNRD1/RASSF4/SLC52A3/C1orf229/PTK7/MT1A/TNFAIP2/SNORD33/GPX4</i> |
| Group 2 | <i>RAB37/RCC1</i>                                                                                                                                                                                                                                             | <i>CLDN10/BEX3/PCSK9</i>                                                                                                                                                                    |
| Group 3 | <i>RPA4/FBXW7/SLC7A2/SFMBT2/NFAT5/UGGT1/PTPRA/NFAT 2IP</i>                                                                                                                                                                                                    | <i>FKBP2/TRAPPC2B</i>                                                                                                                                                                       |
| Group 4 | <i>NGEF/AK4/CLIP2</i>                                                                                                                                                                                                                                         | <i>GFRA3</i>                                                                                                                                                                                |
| Group 5 | <i>MDK/HOXB7/CDH26</i>                                                                                                                                                                                                                                        | <i>CDH26</i>                                                                                                                                                                                |
| Group 6 | <i>TMEM27/ZNF136</i>                                                                                                                                                                                                                                          | <i>GPX2/NQO1/OSBP2/GAD1/MISP/TRIP13</i>                                                                                                                                                     |

**Table S3:** Heatmap signature genes ( $|\text{Log FC}| > 2$ )

| Gene name      | Expression level | Progression level | Log FC |
|----------------|------------------|-------------------|--------|
| <i>GPX2</i>    | Upregulated      | Stage IIIB to IV  | 6.596  |
| <i>CLDN10</i>  | Upregulated      | Stage IB to IIA   | 3.916  |
| <i>ITLN2</i>   | Downregulated    | Stage IA to IB    | 3.83   |
| <i>TMEM27</i>  | Downregulated    | Stage IIIB to IV  | 3.51   |
| <i>GAD1</i>    | Upregulated      | Stage IIIB to IV  | 3.216  |
| <i>MT1X</i>    | Upregulated      | Stage IA to IB    | 3.07   |
| <i>GFRA3</i>   | Upregulated      | Stage IIB to IIIA | 3.02   |
| <i>CA4</i>     | Downregulated    | Stage IA to IB    | 2.603  |
| <i>MT2A</i>    | Upregulated      | Stage IA to IB    | 2.506  |
| <i>TMPRSS3</i> | Downregulated    | Stage IA to IB    | 2.503  |
| <i>STXBP6</i>  | Downregulated    | Stage IA to IB    | 2.44   |
| <i>SLC7A2</i>  | Downregulated    | Stage IIA to IIB  | 2.36   |
| <i>AGER</i>    | Downregulated    | Stage IA to IB    | 2.313  |
| <i>BMP4</i>    | Downregulated    | Stage IA to IB    | 2.306  |
| <i>OSBP2</i>   | Upregulated      | Stage IIIB to IV  | 2.273  |
| <i>SNORD46</i> | Upregulated      | Stage IA to IB    | 2.27   |
| <i>NQO1</i>    | Upregulated      | Stage IIIB to IV  | 2.206  |
| <i>AK4</i>     | Downregulated    | Stage IIB to IIIA | 2.17   |
| <i>TMEM100</i> | Downregulated    | Stage IA to IB    | 2.05   |

**Table S4:** Dysregulated genes play EMT promoter role

| Data series | Positive regulation of EMT           | Negative regulation of EMT      |
|-------------|--------------------------------------|---------------------------------|
| GSE41271    | <i>BMP4</i>                          |                                 |
| GSE42127    | <i>AXIN2/BMP4/BAMBI/TRIM28/Fgfr1</i> | <i>SPRY2/SPRED1/HPN</i>         |
| GSE75037    | <i>DLG5/FLNA/MDK/MYOCD</i>           | <i>SFRP2/PTEN/FOXA1/ADIPOR1</i> |

Downregulation of the DEGs contribute to negative regulation of EMT, while the upregulation of DEGs involve in the positive regulation of EMT leads to EMT and metastasis. EMT; Epithelial-to-mesenchymal transition and DEGs; Differentially expressed genes.

**Table S5:** Key proteins in the protein-protein interaction (PPI) network

| Protein | Degree | Betweenness centrality |
|---------|--------|------------------------|
| BMP4    | 5      | 0.7                    |
| NQO1    | 4      | 0.66                   |
| RHOJ    | 3      | 1                      |
| ZNRD1   | 3      | 0.66                   |
| GPX4    | 3      | 0.55                   |
